# Supplementary material for: Tuning hydrogen production during oxide irradiation through surface grafting
Source: Royal Society of Chemistry journal article supplement (doi:10.1039/b901936g), 2009-01-01
Supplement: b901936g.pdf [file b901936g.pdf]

**Supplementary material**  
**Tuning Hydrogen production during oxide irradiation**  
**through surface grafting**

M. S. Alam, F. Miserque, M. Taguchi, L. Boulanger, J.P. Renault

***Connection between  $G(H_2)_{Ti}$  and  $TiO_2$  band gap values.***

We hypothesize that the energy transfer speed  $k_7$  is proportional to the energy overlap between the exciton and the bond to be dissociated.

Assuming a Gaussian shape for the distribution of exciton energy centered at the band gap value  $E_{exciton}$  and for the dissociating bond energy  $E_{bond}$  centered at 5eV, the overlap integral  $I$  can be calculated as :

$$I = cst \times \exp\left(-\frac{(E_{exciton} - E_{bond})^2}{2 \times (\sigma_{exciton}^2 + \sigma_{bond}^2)}\right) \quad (s1)$$

where  $\sigma_{exciton}$  (respectively  $\sigma_{bond}$ ) is the standard deviation of the exciton energy (respectively of the bond to be dissociated). We assumed as a guess value that  $\sigma_{bond}$  could be equalled to the standard deviation of  $H_2$  production with respect to band gap (figure 9 in ref (1) i.e. about 0.5 eV. We used also for  $E_{bond}$  the 5 eV value proposed in reference 1. For  $\sigma_{exciton}$  we used 0,5 eV, a value derived from emission studies on many types of  $TiO_2$  powders.(2-4)  $E_{exciton}$  was equalled to the band gap values measured in figure S3.

Figure S1 shows the variation the overlap integral with respect to the variation of the yield. The correlation is quite good with the value given previously and can be further adjusted by slightly increasing  $\sigma_{bond}$  or  $\sigma_{exciton}$ . Therefore the overlap model explain quantitatively most of the variation of  $H_2$  production upon titanium grafting

- [1] N. G. Petrik, A. B. Alexandrov, A. I. Vall, *J. Phys. Chem. B* **2001**, *105*, 5935.
- [2] K. Iijima, M. Goto, S. Enomoto, H. Kunugita, K. Ema, M. Tsukamoto, N. Ichikawa, H. Sakama, *J. Lumin.* **2008**, *128*, 911.
- [3] N. Harada, M. Goto, K. Iijima, H. Sakama, N. Ichikawa, H. Kunugita, K. Ema, *Japan. J. Appl. Phys. Part I* **2007**, *46*, 4170.
- [4] A. Riss, T. Berger, H. Grothe, J. Bernardi, O. Diwald, E. Knozinger, *Nano Lett.* **2007**, *7*, 433.

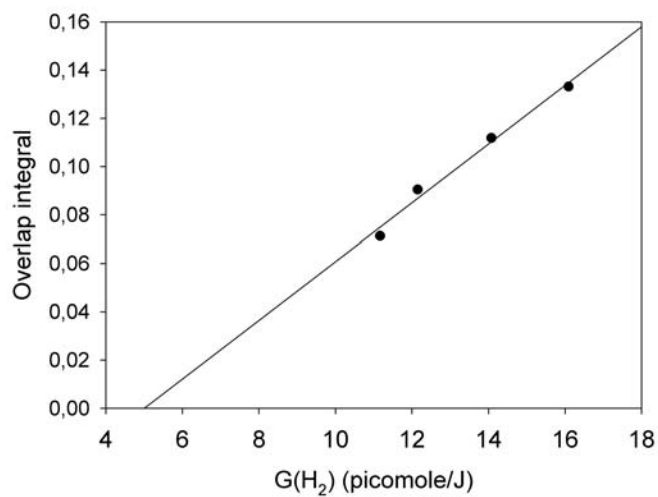

**Figure S1.** Correlation between the variation of H<sub>2</sub> radiolytic yield and the energy transfer integral I between exciton in TiO<sub>2</sub> and water (equation S1)

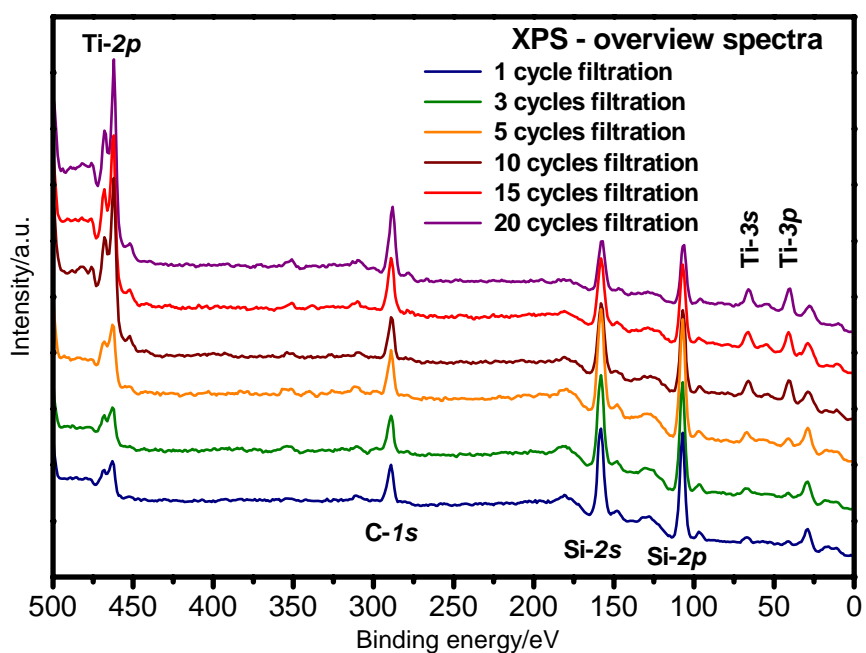

**Figure S2.** typical XPS spectra of Ti grafted silica fibers.

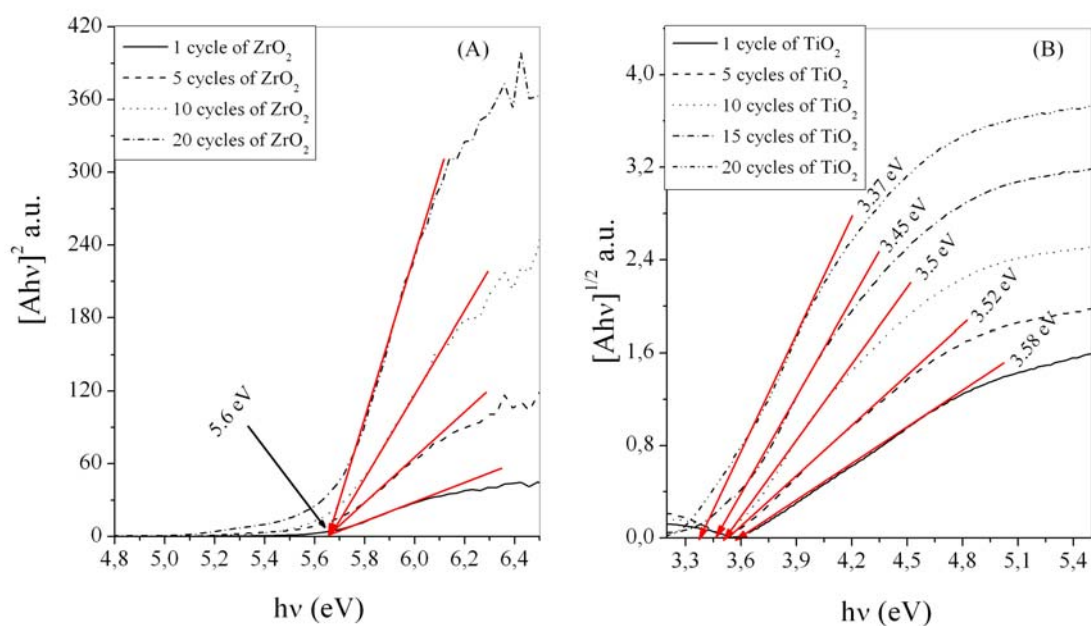

**Figure S3 :** Plot to determine the band gap

(A) Direct band gap (plot of  $(F(R).h\nu)^2$  vs.  $h\nu$ ) for zirconium grafted silica

(B) Indirect band gap (plot of  $(F(R).h\nu)^{1/2}$  vs.  $h\nu$ ) for titanium grafted silica

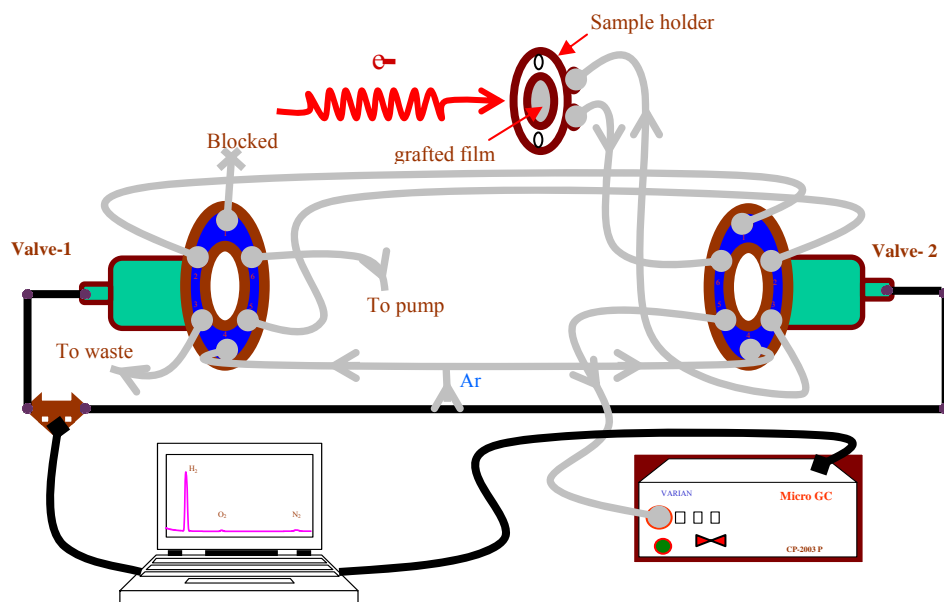

**Figure S4. :** System for the analysis of the gas produced under irradiation.

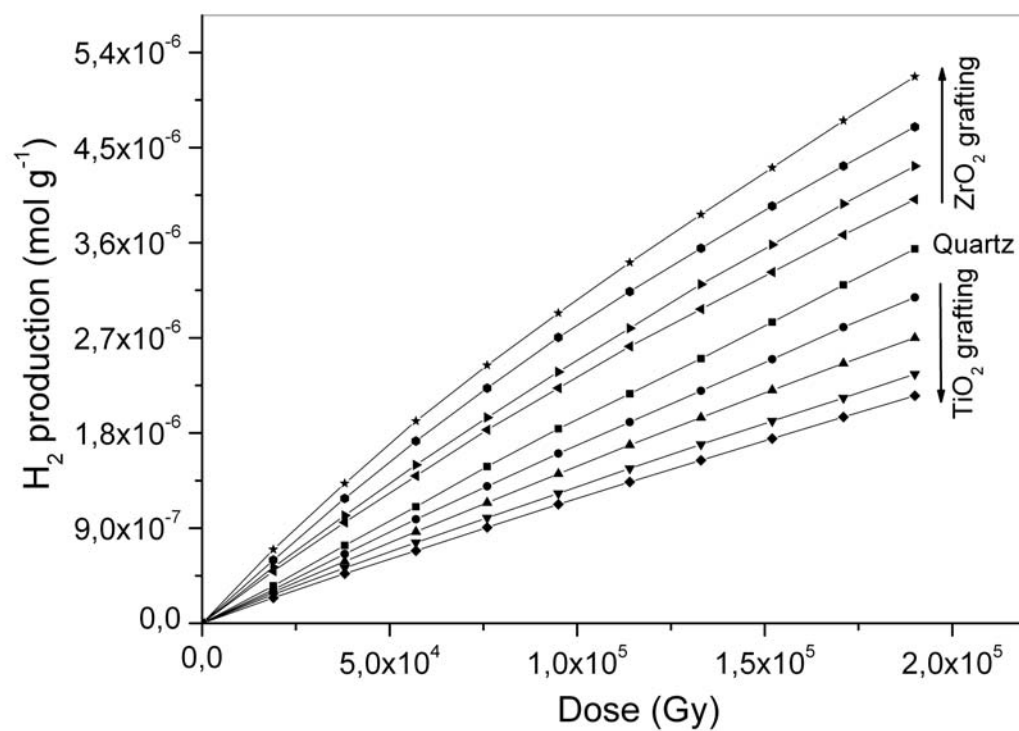

**Figure S5:** Comparison of dihydrogen production in moles per gram of silica, titanium and zirconium grafted silica samples after irradiation with 10 MeV electrons.
